# Supplementary figures and images for: Expression of Apoptosis-Related Biomarkers in Inflamed Nasal Sinus Epithelium of Patients with Chronic Rhinosinusitis with Nasal Polyps (CRSwNP)—Evaluation at mRNA and miRNA Levels
Source: MDPI journal article supplement (doi:10.3390/biomedicines10061400), 2022-06-13

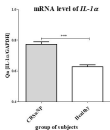

(a)

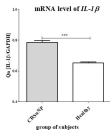

(b)

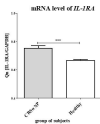

(c)

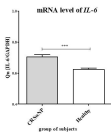

(d)

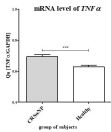

(e)

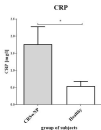

(f)

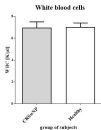

(g)

Supplement: s1 [file s1]
